# Supplementary material for: Phenotypic Variation in European Wild Pear (Pyrus pyraster (L.) Burgsd.) Populations in the North-Western Part of the Balkan Peninsula
Source: MDPI journal article supplement (doi:10.3390/plants11030335), 2022-01-27
Supplement: s1 [file s1]

**Table S1.** Number of individuals (N), geographic coordinates, altitudes, and bioclimatic variables for 19 *Pyrus pyraeaster* populations (n = 190). Bioclim variables: BIO1 (Annual Mean Temperature); BIO2 (Mean Diurnal Range (Mean of monthly (max temp–min temp))); BIO3 (Isothermality (BIO2/BIO7) ( $\times 100$ )); BIO4 (Temperature Seasonality (standard deviation  $\times 100$ )); BIO5 (Max Temperature of Warmest Month); BIO6 (Min Temperature of Coldest Month); BIO7 (Temperature Annual Range (BIO5-BIO6)); BIO8 (Mean Temperature of Wettest Quarter); BIO9 (Mean Temperature of Driest Quarter); BIO10 (Mean Temperature of Warmest Quarter); BIO11 (Mean Temperature of Coldest Quarter); BIO12 (Annual Precipitation); BIO13 (Precipitation of Wettest Month); BIO14 (Precipitation of Driest Month); BIO15 (Precipitation Seasonality (Coefficient of Variation)); BIO16 (Precipitation of Wettest Quarter); BIO17 (Precipitation of Driest Quarter); BIO18 (Precipitation of Warmest Quarter); BIO19 (Precipitation of Coldest Quarter). Populations: P01 – Kuberton; P02 – Hum; P03 – Lupoglav; P04 – Kozji vrh; P05 – Lukovdol; P06 – Ogulin; P07 – Brinje; P08 – Plitvička jezera; P09 – Perušić; P10 – Rumin; P11 – Voštane; P12 – Studenci; P13 – Žumberak; P14 – Strahinščica; P15 – Kalnik; P16 – Moslavačka gora; P17 – Lipovljani; P18 – Psunj; P19 – Vinkovci.

| Pop. ID | N  | Longitude | Latitude | Alt. | Bioclim variables |      |      |       |      |      |      |      |      |      |      |      |     |    |      |     |     |     |     |
|---------|----|-----------|----------|------|-------------------|------|------|-------|------|------|------|------|------|------|------|------|-----|----|------|-----|-----|-----|-----|
|         |    |           |          |      | 1                 | 2    | 3    | 4     | 5    | 6    | 7    | 8    | 9    | 10   | 11   | 12   | 13  | 14 | 15   | 16  | 17  | 18  | 19  |
| P01     | 10 | 13.777    | 45.433   | 440  | 11.8              | 8.3  | 32.5 | 649.1 | 24.3 | -1.2 | 25.5 | 8.2  | 4.9  | 20.1 | 4.2  | 1272 | 143 | 72 | 19.9 | 400 | 259 | 293 | 285 |
| P02     | 10 | 14.046    | 45.351   | 304  | 12.4              | 9.4  | 34.3 | 664.9 | 25.7 | -1.6 | 27.3 | 8.6  | 5.4  | 20.9 | 4.5  | 1190 | 138 | 70 | 21.1 | 385 | 250 | 268 | 276 |
| P03     | 10 | 14.094    | 45.368   | 391  | 10.6              | 8.7  | 34.2 | 635.1 | 22.9 | -2.6 | 25.5 | 7.2  | 3.7  | 18.7 | 3.3  | 1380 | 164 | 82 | 20.9 | 448 | 293 | 308 | 325 |
| P04     | 10 | 14.591    | 45.628   | 885  | 7.0               | 9.2  | 33.8 | 684.3 | 20.0 | -7.2 | 27.2 | 7.9  | -0.4 | 15.6 | -1.1 | 1505 | 163 | 89 | 18.1 | 452 | 293 | 387 | 302 |
| P05     | 10 | 15.123    | 45.434   | 400  | 9.6               | 9.2  | 32.1 | 690.4 | 23.0 | -5.5 | 28.5 | 9.9  | 2.4  | 18.1 | 1.1  | 1428 | 155 | 78 | 19.9 | 440 | 263 | 364 | 283 |
| P06     | 10 | 15.244    | 45.264   | 320  | 10.3              | 9.8  | 33.0 | 717.4 | 24.0 | -5.6 | 29.6 | 10.5 | 2.8  | 19.0 | 1.3  | 1331 | 146 | 79 | 19.2 | 418 | 257 | 321 | 276 |
| P07     | 10 | 15.199    | 45.059   | 496  | 8.7               | 11.2 | 36.9 | 711.8 | 22.8 | -7.5 | 30.3 | 9.1  | 1.4  | 17.5 | -0.2 | 1382 | 165 | 81 | 22.6 | 455 | 287 | 290 | 314 |
| P08     | 10 | 15.687    | 44.858   | 646  | 8.6               | 10.1 | 34.7 | 678.4 | 22.3 | -6.9 | 29.2 | 9.3  | 1.3  | 17.0 | 0.3  | 1340 | 157 | 86 | 19.5 | 426 | 284 | 289 | 308 |
| P09     | 10 | 15.345    | 44.672   | 572  | 8.9               | 10.8 | 35.4 | 718.3 | 23.2 | -7.2 | 30.4 | 4.5  | 17.8 | 17.8 | 0.03 | 1246 | 162 | 58 | 28.1 | 432 | 225 | 225 | 311 |
| P10     | 10 | 16.708    | 43.826   | 938  | 8.4               | 12.0 | 40.4 | 662.4 | 22.8 | -7.0 | 29.8 | 5.1  | 16.6 | 16.6 | 0.4  | 1045 | 134 | 54 | 25.9 | 361 | 199 | 199 | 265 |
| P11     | 10 | 16.900    | 43.668   | 1026 | 7.4               | 11.8 | 39.9 | 651.1 | 21.9 | -7.7 | 29.6 | 4.5  | 15.6 | 15.6 | -0.3 | 1039 | 135 | 52 | 26.5 | 361 | 194 | 194 | 267 |
| P12     | 10 | 17.039    | 43.537   | 668  | 10.5              | 10.9 | 38.2 | 654.2 | 24.0 | -4.5 | 28.5 | 7.3  | 18.7 | 18.7 | 2.6  | 963  | 128 | 45 | 29.1 | 344 | 169 | 169 | 257 |
| P13     | 10 | 15.533    | 45.818   | 663  | 8.7               | 8.6  | 30.8 | 702.6 | 21.9 | -6.2 | 28.1 | 17.4 | 1.4  | 17.4 | 0.1  | 1207 | 132 | 59 | 21.8 | 358 | 209 | 358 | 215 |
| P14     | 10 | 15.916    | 46.195   | 543  | 9.0               | 8.6  | 30.2 | 715.7 | 22.4 | -6.2 | 28.6 | 17.8 | 1.6  | 17.8 | 0.2  | 1107 | 127 | 52 | 24.2 | 348 | 187 | 348 | 190 |
| P15     | 10 | 16.530    | 46.157   | 280  | 10.1              | 8.7  | 29.7 | 723.6 | 23.7 | -5.5 | 29.2 | 18.9 | 2.6  | 18.9 | 0.9  | 852  | 96  | 43 | 23.3 | 264 | 142 | 264 | 150 |
| P16     | 10 | 16.704    | 45.566   | 107  | 11.3              | 9.9  | 31.4 | 768.9 | 26.0 | -5.5 | 31.5 | 20.7 | 3.4  | 20.7 | 1.7  | 889  | 92  | 51 | 17.7 | 256 | 165 | 256 | 173 |
| P17     | 10 | 16.829    | 45.375   | 105  | 11.2              | 9.9  | 32.3 | 731.0 | 25.5 | -5.4 | 30.9 | 20.0 | 3.6  | 20.0 | 1.9  | 918  | 93  | 54 | 16.1 | 263 | 175 | 263 | 183 |
| P18     | 10 | 17.312    | 45.338   | 531  | 9.6               | 8.3  | 30.7 | 688.4 | 22.0 | -5.1 | 27.1 | 17.9 | 2.3  | 17.9 | 0.9  | 995  | 111 | 57 | 18.6 | 300 | 185 | 300 | 193 |
| P19     | 10 | 18.874    | 45.236   | 96   | 11.1              | 9.9  | 31.5 | 785.3 | 25.4 | -5.9 | 31.3 | 20.6 | 2.9  | 20.6 | 1.2  | 678  | 87  | 39 | 22.9 | 218 | 125 | 218 | 136 |

**Table S2.** Pearson correlation coefficients between 19 bioclimatic variables and scores of the first five principal components. Bioclim variables: BIO1 (Annual Mean Temperature); BIO2 (Mean Diurnal Range (Mean of monthly (max temp–min temp))); BIO3 (Isothermality (BIO2/BIO7) (×100)); BIO4 (Temperature Seasonality (standard deviation ×100)); BIO5 (Max Temperature of Warmest Month); BIO6 (Min Temperature of Coldest Month); BIO7 (Temperature Annual Range (BIO5–BIO6)); BIO8 (Mean Temperature of Wettest Quarter); BIO9 (Mean Temperature of Driest Quarter); BIO10 (Mean Temperature of Warmest Quarter); BIO11 (Mean Temperature of Coldest Quarter); BIO12 (Annual Precipitation); BIO13 (Precipitation of Wettest Month); BIO14 (Precipitation of Driest Month); BIO15 (Precipitation Seasonality (Coefficient of Variation)); BIO16 (Precipitation of Wettest Quarter); BIO17 (Precipitation of Driest Quarter); BIO18 (Precipitation of Warmest Quarter); BIO19 (Precipitation of Coldest Quarter).

| Variable         | PC—Principal Component |        |        |        |        |
|------------------|------------------------|--------|--------|--------|--------|
|                  | PC1                    | PC2    | PC3    | PC4    | PC5    |
| BIO1             | 0.586                  | -0.503 | -0.601 | -0.189 | -0.057 |
| BIO2             | -0.165                 | 0.861  | -0.188 | -0.396 | 0.170  |
| BIO3             | -0.487                 | 0.698  | -0.422 | -0.125 | 0.248  |
| BIO4             | 0.681                  | 0.026  | 0.494  | -0.447 | -0.262 |
| BIO5             | 0.704                  | -0.154 | -0.523 | -0.442 | -0.050 |
| BIO6             | 0.146                  | -0.667 | -0.702 | 0.191  | 0.013  |
| BIO7             | 0.466                  | 0.576  | 0.287  | -0.596 | -0.058 |
| BIO8             | 0.816                  | -0.301 | 0.462  | 0.032  | 0.027  |
| BIO9             | -0.088                 | 0.767  | -0.548 | 0.135  | -0.111 |
| BIO10            | 0.684                  | -0.469 | -0.461 | -0.277 | -0.140 |
| BIO11            | 0.247                  | -0.508 | -0.821 | 0.020  | 0.046  |
| BIO12            | -0.904                 | -0.355 | 0.074  | -0.164 | -0.116 |
| BIO13            | -0.963                 | -0.073 | -0.091 | -0.114 | -0.206 |
| BIO14            | -0.795                 | -0.488 | 0.072  | -0.316 | 0.123  |
| BIO15            | -0.102                 | 0.744  | -0.314 | 0.298  | -0.465 |
| BIO16            | -0.955                 | -0.146 | -0.088 | -0.146 | -0.184 |
| BIO17            | -0.874                 | -0.398 | -0.051 | -0.262 | 0.032  |
| BIO18            | -0.348                 | -0.713 | 0.557  | 0.053  | -0.108 |
| BIO19            | -0.924                 | -0.019 | -0.302 | -0.208 | -0.039 |
| Eigenvalue       | 8.05                   | 5.05   | 3.60   | 1.46   | 0.54   |
| % Total Variance | 42.36                  | 26.58  | 18.94  | 7.66   | 2.83   |

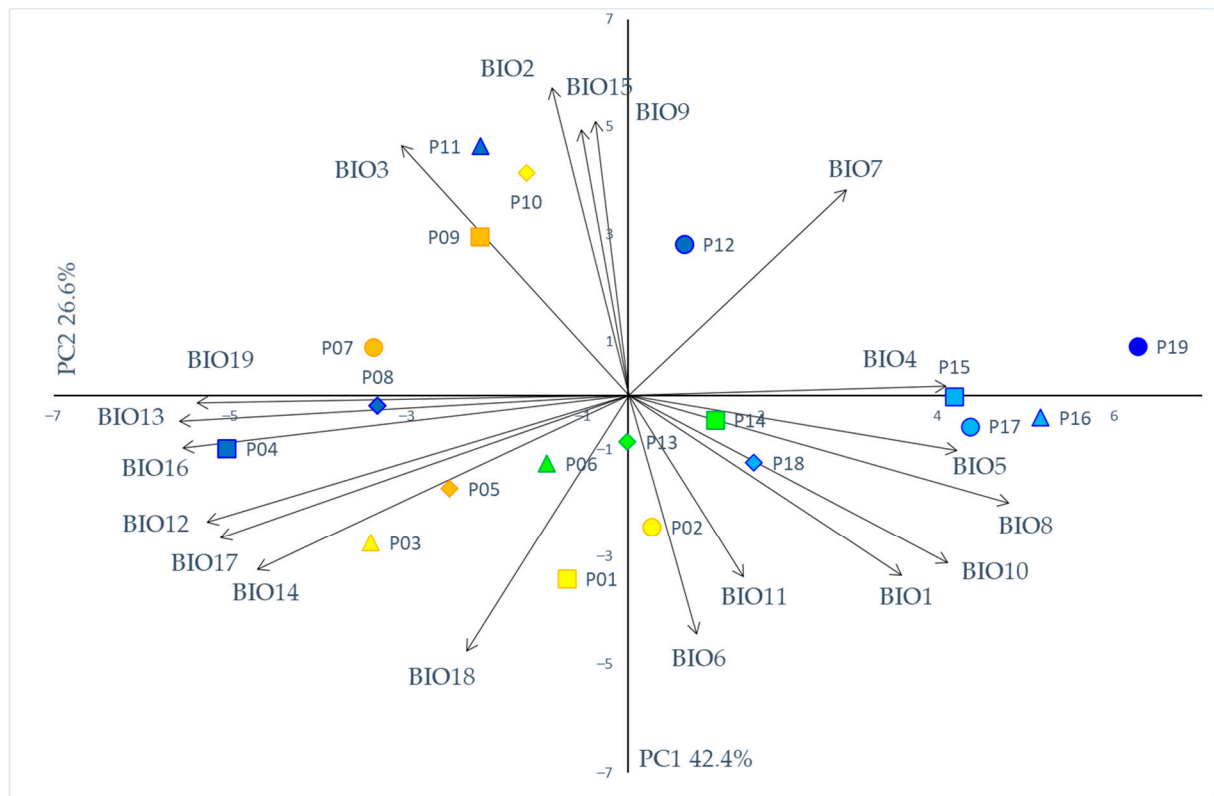

**Figure S1.** Biplot of the principal component (PC) analysis based on 19 bioclimatic variables in 19 studied *Pyrus pyraaster* populations. Bioclim variables: BIO1 (Annual Mean Temperature); BIO2 (Mean Diurnal Range (Mean of monthly (max temp–min temp))); BIO3 (Isothermality (BIO2/BIO7) ( $\times 100$ )); BIO4 (Temperature Seasonality (standard deviation  $\times 100$ )); BIO5 (Max Temperature of Warmest Month); BIO6 (Min Temperature of Coldest Month); BIO7 (Temperature Annual Range (BIO5–BIO6)); BIO8 (Mean Temperature of Wettest Quarter); BIO9 (Mean Temperature of Driest Quarter); BIO10 (Mean Temperature of Warmest Quarter); BIO11 (Mean Temperature of Coldest Quarter); BIO12 (Annual Precipitation); BIO13 (Precipitation of Wettest Month); BIO14 (Precipitation of Driest Month); BIO15 (Precipitation Seasonality (Coefficient of Variation)); BIO16 (Precipitation of Wettest Quarter); BIO17 (Precipitation of Driest Quarter); BIO18 (Precipitation of Warmest Quarter); BIO19 (Precipitation of Coldest Quarter). Populations: P01 – Kuberton; P02 – Hum; P03 – Lupoglav; P04 – Kozji vrh; P05 – Lukovdol; P06 – Ogulin; P07 – Brinje; P08 – Plitvička jezera; P09 – Perušić; P10 – Rumin; P11 – Voštane; P12 – Studenci; P13 – Žumberak; P14 – Strahinščica; P15 – Kalnik; P16 – Moslavačka gora; P17 – Lipovljani; P18 – Psunj; P19 – Vinkovci.

**Table S3.** Descriptive statistics shown for each studied population. Populations: P01—Kuberton; P02—Hum; P03—Lupoglav; P04—Kozji vrh; P05—Lukovdol; P06—Ogulin; P07—Brinje; P08—Plitvička jezera; P09—Perušić; P10—Rumin; P11—Voštane; P12—Studenci; P13—Žumberak; P14—Strahinščica; P15—Kalnik; P16—Moslavačka gora; P17—Lipovljani; P18—Psunj; P19—Vinkovci. Leaf phenotypic traits: LA—leaf area; PE—perimeter; LL—leaf length; MLW—maximum leaf width; PMLW—leaf length, measured from the leaf base to the point of maximum leaf width; LWT—leaf blade width at 90% of leaf blade length; PL—petiole length; FC—form coefficient; LA10—angle closed by the main leaf vein (the center of the leaf blade) and the line connecting the leaf blade base to a set point on the leaf margin at 10% of total leaf blade length; and LA25—angle closed by the main leaf vein (the center of the leaf blade) and the line connecting the leaf blade base to a set point on the leaf margin at 25% of total leaf blade length. Maximal and minimal values for arithmetic mean (M) and coefficient of variation (CV) are highlighted with red and green colors, respectively.

| Population | LA    |       | PE    |       | FC   |       | LL   |       | MLW  |       | PMLW |       | LWT  |       | LA10  |       | LA25  |       | PL   |       |
|------------|-------|-------|-------|-------|------|-------|------|-------|------|-------|------|-------|------|-------|-------|-------|-------|-------|------|-------|
|            | M     | CV    | M     | CV    | M    | CV    | M    | CV    | M    | CV    | M    | CV    | M    | CV    | M     | CV    | M     | CV    | M    | CV    |
| P01        | 7.40  | 27.10 | 10.45 | 16.81 | 0.85 | 13.13 | 3.64 | 18.16 | 2.73 | 16.17 | 1.54 | 22.13 | 1.14 | 36.89 | 65.13 | 10.34 | 52.31 | 11.22 | 3.36 | 31.80 |
| P02        | 7.29  | 35.78 | 9.87  | 18.60 | 0.92 | 12.70 | 3.43 | 19.48 | 2.79 | 20.02 | 1.38 | 26.85 | 1.15 | 37.56 | 68.19 | 9.39  | 55.27 | 9.98  | 2.86 | 33.44 |
| P03        | 7.01  | 43.31 | 9.91  | 20.60 | 0.86 | 12.71 | 3.50 | 19.66 | 2.61 | 23.25 | 1.42 | 23.53 | 1.04 | 42.51 | 63.24 | 14.35 | 52.18 | 9.73  | 3.09 | 37.38 |
| P04        | 10.00 | 34.74 | 11.66 | 19.81 | 0.91 | 12.72 | 3.85 | 19.85 | 3.34 | 17.32 | 1.64 | 23.19 | 1.52 | 33.17 | 69.36 | 7.71  | 56.84 | 7.93  | 3.84 | 28.44 |
| P05        | 9.57  | 31.66 | 11.23 | 19.63 | 0.95 | 14.13 | 3.93 | 18.75 | 3.15 | 16.70 | 1.47 | 26.33 | 1.24 | 28.53 | 70.13 | 6.25  | 55.88 | 6.97  | 3.49 | 28.65 |
| P06        | 10.12 | 41.68 | 11.64 | 22.35 | 0.91 | 12.06 | 3.71 | 20.04 | 3.42 | 22.46 | 1.50 | 26.98 | 1.57 | 36.48 | 71.74 | 5.02  | 58.79 | 5.85  | 3.43 | 39.40 |
| P07        | 8.73  | 30.27 | 11.13 | 20.74 | 0.89 | 15.51 | 3.57 | 19.58 | 3.18 | 14.50 | 1.45 | 25.42 | 1.37 | 29.50 | 70.99 | 6.38  | 58.11 | 7.00  | 3.47 | 27.95 |
| P08        | 9.93  | 26.51 | 11.73 | 15.56 | 0.90 | 11.54 | 3.88 | 15.04 | 3.32 | 14.00 | 1.57 | 20.65 | 1.46 | 26.00 | 69.84 | 5.82  | 56.88 | 5.59  | 3.81 | 24.69 |
| P09        | 9.92  | 36.55 | 11.37 | 19.29 | 0.96 | 11.69 | 3.88 | 18.81 | 3.28 | 19.35 | 1.56 | 23.12 | 1.45 | 32.62 | 69.63 | 6.83  | 56.56 | 7.32  | 3.60 | 29.78 |
| P10        | 8.59  | 28.28 | 11.09 | 15.74 | 0.87 | 11.38 | 3.57 | 17.67 | 3.11 | 13.66 | 1.58 | 19.87 | 1.55 | 25.02 | 68.81 | 6.79  | 56.49 | 7.21  | 3.22 | 28.74 |
| P11        | 10.15 | 28.89 | 11.76 | 18.23 | 0.92 | 15.38 | 3.79 | 17.55 | 3.39 | 14.93 | 1.55 | 22.08 | 1.64 | 24.71 | 71.11 | 5.90  | 58.03 | 6.16  | 3.79 | 24.82 |
| P12        | 11.25 | 24.85 | 12.36 | 13.54 | 0.92 | 11.77 | 4.21 | 13.22 | 3.42 | 15.14 | 1.76 | 17.75 | 1.63 | 23.31 | 69.19 | 5.79  | 55.35 | 7.07  | 3.60 | 27.57 |
| P13        | 9.99  | 32.44 | 11.73 | 18.38 | 0.91 | 15.43 | 3.97 | 19.24 | 3.28 | 17.60 | 1.54 | 29.26 | 1.32 | 39.03 | 69.69 | 9.95  | 56.18 | 10.00 | 3.73 | 31.69 |
| P14        | 10.00 | 36.10 | 11.65 | 20.67 | 0.91 | 13.74 | 3.75 | 21.30 | 3.42 | 17.47 | 1.50 | 22.15 | 1.45 | 28.28 | 71.46 | 5.25  | 58.69 | 6.17  | 3.08 | 38.81 |
| P15        | 12.32 | 35.73 | 13.29 | 19.68 | 0.86 | 13.07 | 4.30 | 19.88 | 3.71 | 18.38 | 1.61 | 23.98 | 1.45 | 31.40 | 71.68 | 4.16  | 57.86 | 5.64  | 3.27 | 34.08 |
| P16        | 11.99 | 34.82 | 13.10 | 17.21 | 0.86 | 11.62 | 4.34 | 18.10 | 3.64 | 17.68 | 1.67 | 19.30 | 1.36 | 33.15 | 69.96 | 5.55  | 56.71 | 6.02  | 3.54 | 36.21 |
| P17        | 11.98 | 30.04 | 12.95 | 18.15 | 0.90 | 15.33 | 4.54 | 18.71 | 3.48 | 15.42 | 1.63 | 23.98 | 1.18 | 34.88 | 69.86 | 6.58  | 55.07 | 8.60  | 4.32 | 28.09 |
| P18        | 10.43 | 29.38 | 11.84 | 17.45 | 0.93 | 13.85 | 3.94 | 19.35 | 3.41 | 15.84 | 1.65 | 23.77 | 1.63 | 28.86 | 69.44 | 9.14  | 56.81 | 9.36  | 3.88 | 28.62 |
| P19        | 11.08 | 25.36 | 12.39 | 16.20 | 0.91 | 14.21 | 4.17 | 19.32 | 3.51 | 12.74 | 1.64 | 19.26 | 1.36 | 31.83 | 70.01 | 6.63  | 56.77 | 8.77  | 3.94 | 30.77 |

**Table S4.** Results of the stepwise discriminant analyses for studied morphometric traits.

| Trait                                                                               | Wilks' | Partial | F-remove | <i>p</i> -value |
|-------------------------------------------------------------------------------------|--------|---------|----------|-----------------|
| LA-leaf area                                                                        | 0.123  | 0.744   | 3.115    | 0.0001          |
| FC-Form coefficient                                                                 | 0.104  | 0.886   | 1.171    | 0.2910          |
| LL-leaf length                                                                      | 0.110  | 0.835   | 1.794    | 0.0298          |
| MLW-maximum leaf width                                                              | 0.109  | 0.843   | 1.683    | 0.0471          |
| PMLW-leaf length, measured from the leaf base<br>to the point of maximum leaf width | 0.100  | 0.921   | 0.772    | 0.7303          |
| LWT-leaf width top                                                                  | 0.109  | 0.839   | 1.738    | 0.0385          |
| LA10-leaf angle 10                                                                  | 0.110  | 0.837   | 1.766    | 0.0341          |
| LA25-leaf angle 25                                                                  | 0.109  | 0.841   | 1.710    | 0.0428          |
| PL-petiole length                                                                   | 0.123  | 0.746   | 3.088    | 0.0001          |

**Table S5.** Correlations between geographic, bioclimatic and phenotypic variables. Statistically significant values are highlighted with red color. Bioclim variables: BIO1 (Annual Mean Temperature); BIO2 (Mean Diurnal Range (Mean of monthly (max temp–min temp))); BIO3 (Isothermality (BIO2/BIO7) (×100)); BIO4 (Temperature Seasonality (standard deviation ×100)); BIO5 (Max Temperature of Warmest Month); BIO6 (Min Temperature of Coldest Month); BIO7 (Temperature Annual Range (BIO5-BIO6)); BIO8 (Mean Temperature of Wettest Quarter); BIO9 (Mean Temperature of Driest Quarter); BIO10 (Mean Temperature of Warmest Quarter); BIO11 (Mean Temperature of Coldest Quarter); BIO12 (Annual Precipitation); BIO13 (Precipitation of Wettest Month); BIO14 (Precipitation of Driest Month); BIO15 (Precipitation Seasonality (Coefficient of Variation)); BIO16 (Precipitation of Wettest Quarter); BIO17 (Precipitation of Driest Quarter); BIO18 (Precipitation of Warmest Quarter); BIO19 (Precipitation of Coldest Quarter). Leaf phenotypic traits: LA—leaf area; PE—perimeter; LL—leaf length; MLW—maximum leaf width; PMLW—leaf length, measured from the leaf base to the point of maximum leaf width; LWT—leaf blade width at 90% of leaf blade length; PL—petiole length; FC—form coefficient; LA10—angle closed by the main leaf vein (the center of leaf blade) and the line connecting the leaf blade base to a set point on the leaf margin at 10% of total leaf blade length; and LA25—angle closed by the main leaf vein (the center of leaf blade) and the line connecting the leaf blade base to a set point on the leaf margin at 25% of total leaf blade length.

| Variable  | LA     | PE     | FC     | LL     | MLW    | PMLW   | LWT    | LA10   | LA25   | PL     |
|-----------|--------|--------|--------|--------|--------|--------|--------|--------|--------|--------|
| Latitude  | 0.399  | 0.316  | 0.381  | 0.210  | 0.458  | 0.030  | 0.291  | 0.501  | 0.548  | 0.110  |
| Longitude | -0.274 | -0.185 | -0.399 | -0.088 | -0.337 | 0.070  | -0.261 | -0.431 | -0.497 | -0.032 |
| BIO1      | -0.062 | -0.046 | -0.309 | 0.180  | -0.216 | -0.065 | -0.583 | -0.361 | -0.503 | -0.221 |
| BIO2      | 0.077  | 0.086  | 0.135  | -0.053 | 0.153  | 0.144  | 0.430  | 0.285  | 0.306  | 0.149  |
| BIO3      | -0.304 | -0.294 | 0.073  | -0.379 | -0.247 | -0.021 | 0.330  | -0.085 | -0.003 | -0.062 |
| BIO4      | 0.656  | 0.655  | 0.052  | 0.592  | 0.684  | 0.293  | 0.037  | 0.555  | 0.469  | 0.344  |
| BIO5      | 0.160  | 0.180  | -0.254 | 0.330  | 0.040  | 0.039  | -0.419 | -0.073 | -0.241 | -0.095 |
| BIO6      | -0.474 | -0.459 | -0.340 | -0.211 | -0.621 | -0.274 | -0.634 | -0.705 | -0.755 | -0.446 |
| BIO7      | 0.647  | 0.649  | 0.139  | 0.517  | 0.699  | 0.327  | 0.307  | 0.688  | 0.593  | 0.392  |
| BIO8      | 0.622  | 0.646  | -0.171 | 0.658  | 0.574  | 0.327  | -0.114 | 0.328  | 0.209  | 0.304  |
| BIO9      | -0.019 | -0.048 | 0.202  | -0.048 | -0.039 | 0.246  | 0.376  | -0.051 | -0.067 | -0.060 |
| BIO10     | 0.064  | 0.078  | -0.275 | 0.275  | -0.071 | -0.018 | -0.551 | -0.228 | -0.373 | -0.157 |
| BIO11     | -0.394 | -0.377 | -0.339 | -0.127 | -0.555 | -0.224 | -0.612 | -0.637 | -0.723 | -0.404 |
| BIO12     | -0.618 | -0.647 | 0.158  | -0.627 | -0.563 | -0.574 | -0.200 | -0.265 | -0.152 | -0.247 |
| BIO13     | -0.684 | -0.718 | 0.226  | -0.727 | -0.606 | -0.552 | -0.069 | -0.291 | -0.139 | -0.308 |
| BIO14     | -0.587 | -0.594 | 0.012  | -0.567 | -0.545 | -0.538 | -0.275 | -0.309 | -0.193 | -0.151 |
| BIO15     | -0.033 | -0.062 | 0.249  | -0.162 | 0.030  | 0.088  | 0.408  | 0.121  | 0.171  | -0.263 |
| BIO16     | -0.680 | -0.713 | 0.204  | -0.717 | -0.609 | -0.578 | -0.105 | -0.280 | -0.143 | -0.326 |
| BIO17     | -0.704 | -0.713 | 0.029  | -0.677 | -0.660 | -0.611 | -0.295 | -0.386 | -0.256 | -0.253 |
| BIO18     | -0.202 | -0.221 | 0.067  | -0.204 | -0.166 | -0.387 | -0.289 | -0.027 | 0.021  | -0.080 |
| BIO19     | -0.699 | -0.723 | 0.140  | -0.691 | -0.662 | -0.487 | -0.102 | -0.396 | -0.272 | -0.264 |
